# Supplementary material for: Microrna-2392 Functions as a Tumor Suppressor Gene and Inhibits Malignant Progression of Hepatocellular Carcinoma Via Directly Targeting JAG2
Source: Research Square preprint supplement (doi:10.21203/rs.3.rs-484869/v1), 2021-05-10
Supplement: Supplementary file 1 [file 1f59fd9f390e9361b397717a.docx]

**Table S1. The target sequences of siRNA-JAG2**

| si-h-JAG2-NC | UUCUCCGAACGUGUCACGUTT |
| --- | --- |
| si-h-JAG2-1 | GGTCGTACTTGCACTCACA |
| si-h-JAG2-2 | GCCTCACCTTGCATTTCAA |
| si-h-JAG2-3 | GGATGAGATCAACGGGTAT |
