# Supplementary material for: Microrna-2392 Functions as a Tumor Suppressor Gene and Inhibits Malignant Progression of Hepatocellular Carcinoma Via Directly Targeting JAG2
Source: Research Square preprint supplement (doi:10.21203/rs.3.rs-484869/v1), 2021-05-10
Supplement: Supplementary file 2 [file a98e7ad00d8435109e3fda9e.docx]

**Table S3. The sequence information of lentiviral vector construction of miR-2392**

| LV-hsa-miR-2392 inhibitor | 5’-CACCTCTCACCCCCATCCTA-3’ |
| --- | --- |
| LV-hsa-miR-2392 mimics | 5’-TAGGATGGGGGTGAGAGGTG-3’ |
| LV-hsa-miR-2392 NC | 5’-TTCTCCGAACGTGTCACGT-3’ |
